# Supplementary figures and images for: A fluorogenic complementation tool kit for interrogating lipid droplet–organelle interaction
Source: PubMed Central journal article supplement — J Cell Biol. 2024 Jul 1;223(9):e202311126. doi: 10.1083/jcb.202311126 (PMC11215687; doi:10.1083/jcb.202311126), 2024-07-01

Figure 2D

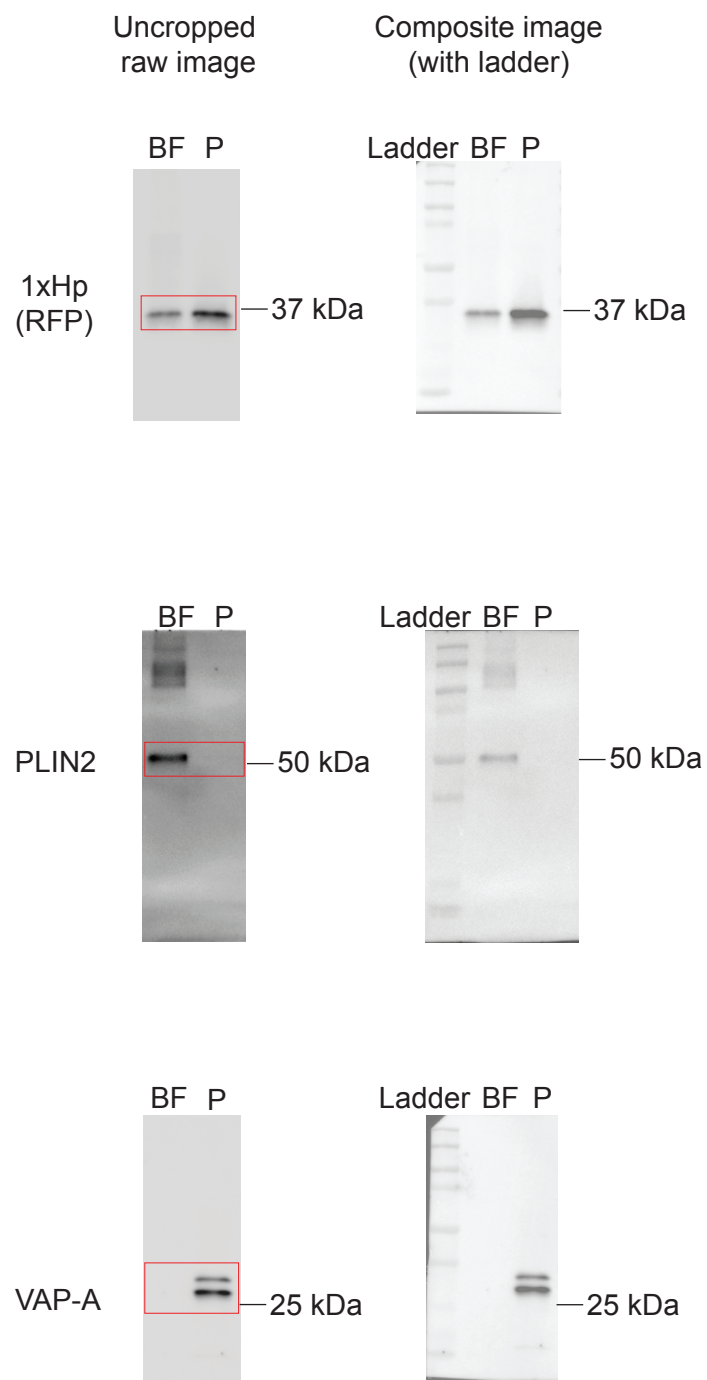

Figure 2E

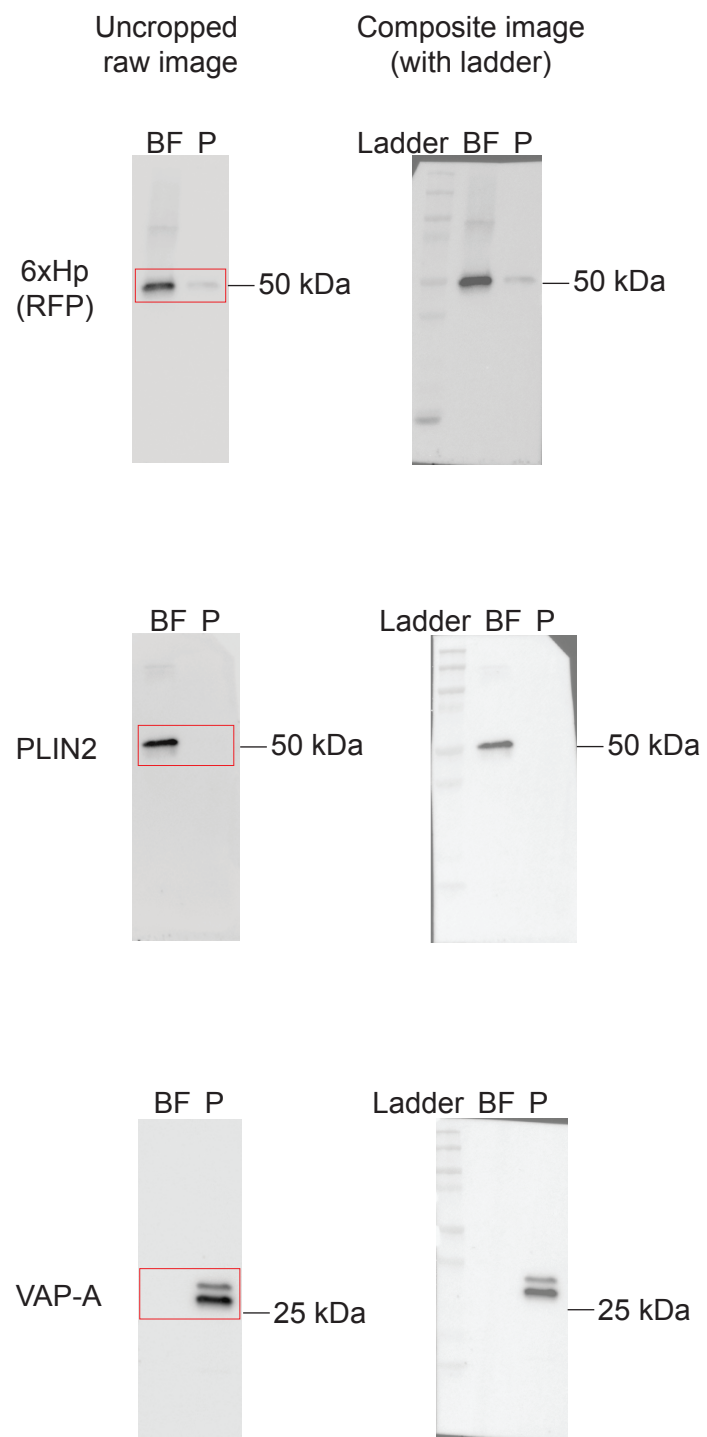

Supplement: JCB_202311126_SourceDataF2.pdf [file JCB_202311126_SourceDataF2.pdf]

Figure 5D

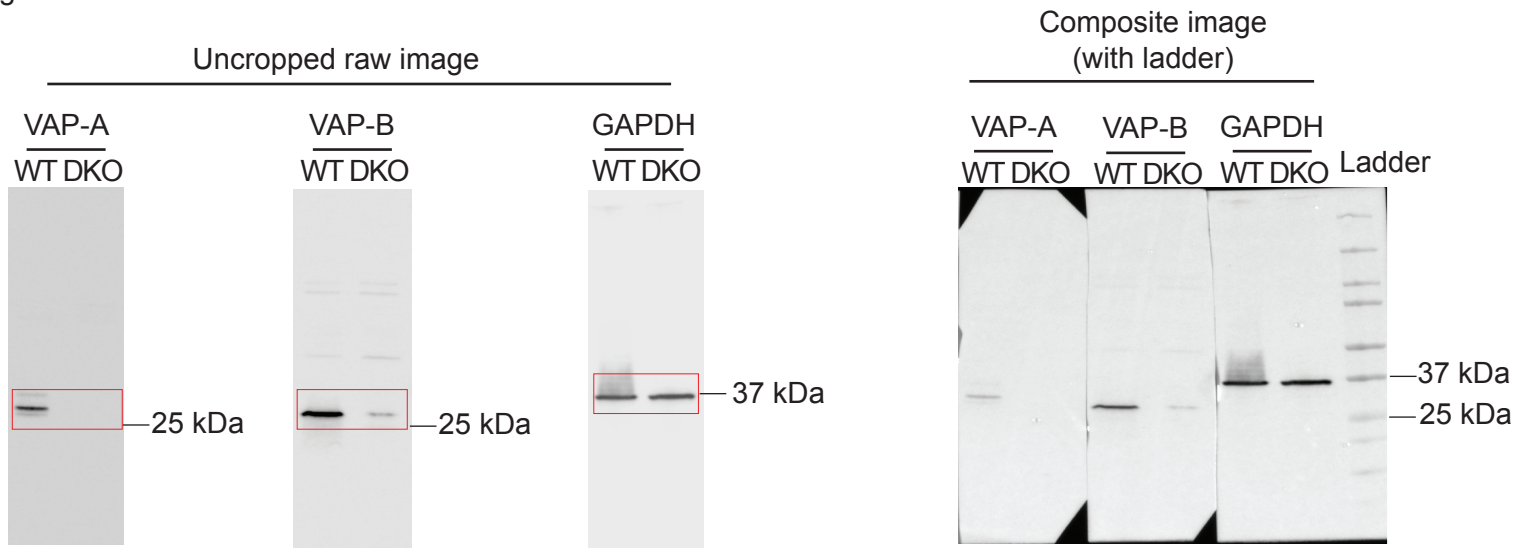

Figure 5H

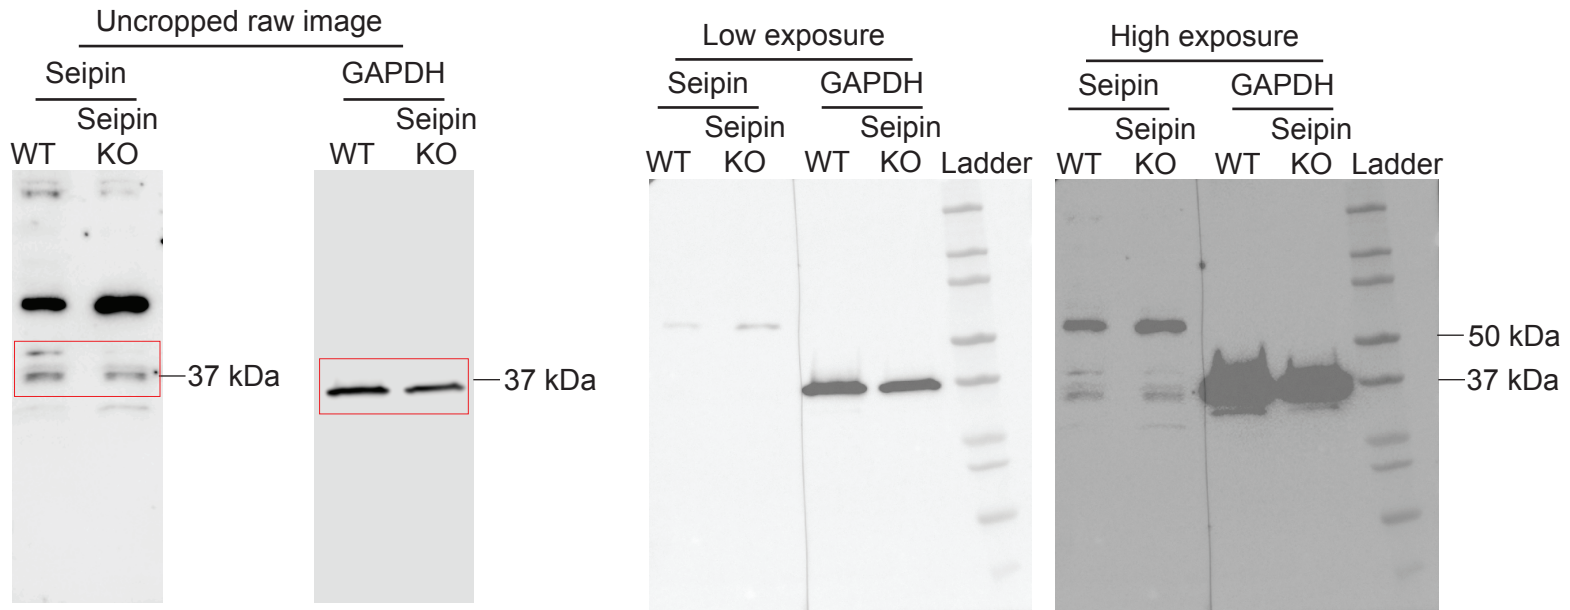

Supplement: JCB_202311126_SourceDataF5.pdf [file JCB_202311126_SourceDataF5.pdf]

Figure 6C

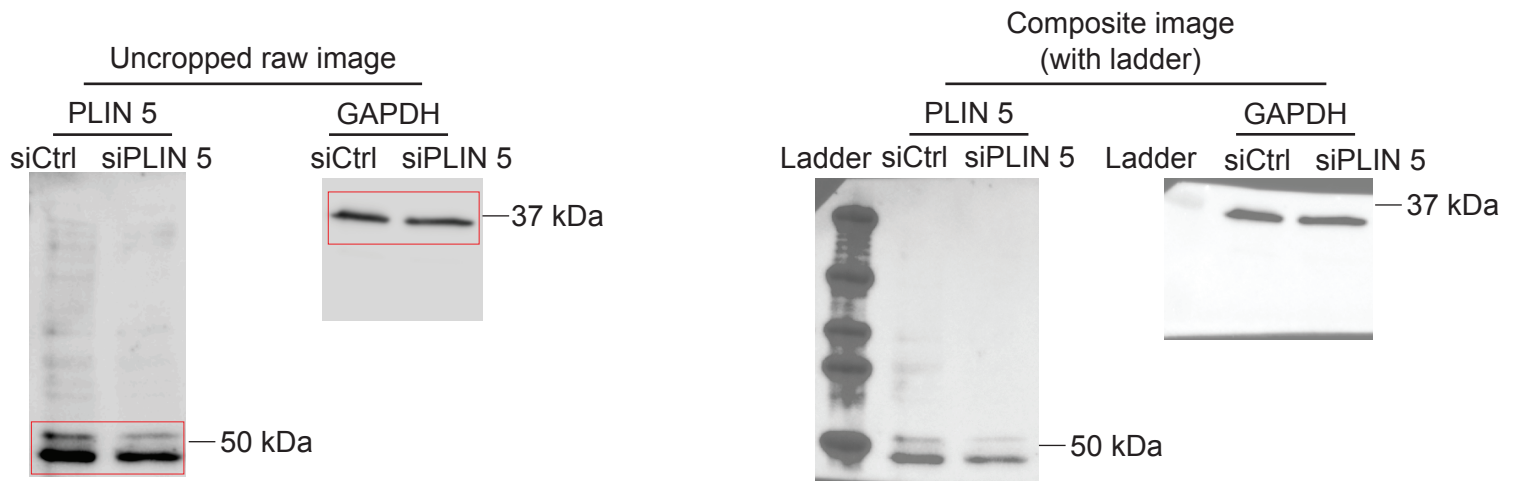

Supplement: JCB_202311126_SourceDataF6.pdf [file JCB_202311126_SourceDataF6.pdf]

Figure 8B

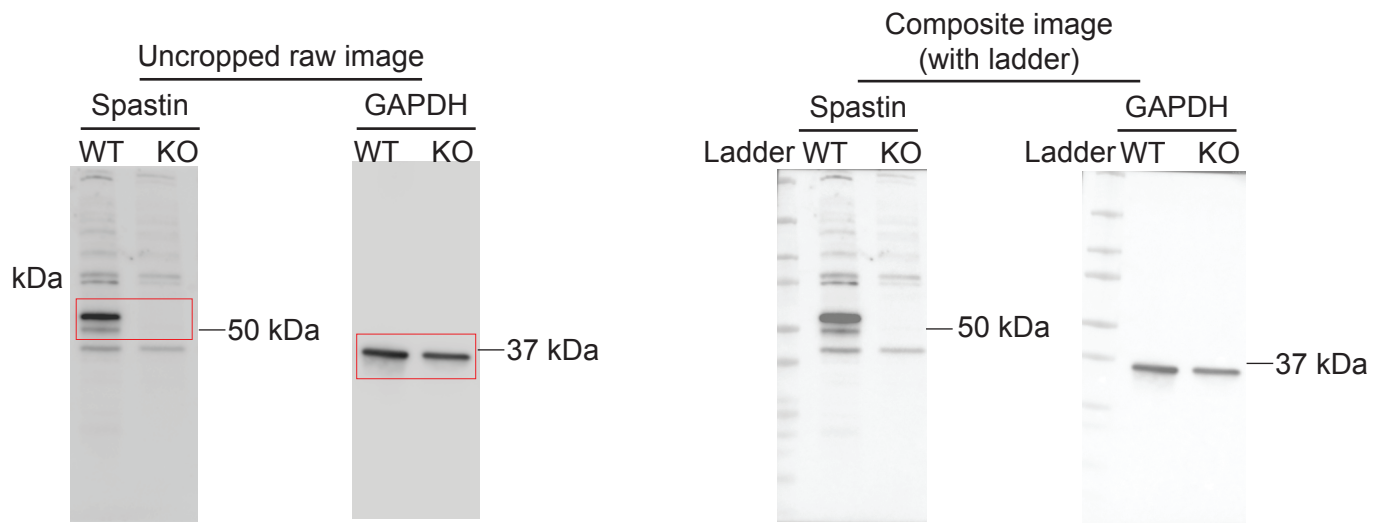

Supplement: JCB_202311126_SourceDataF8.pdf [file JCB_202311126_SourceDataF8.pdf]
